# Supplementary material
Source: MDPI journal article supplement (https://www.mdpi.com/1424-2818/15/7/870)
Supplement: s1 [file s1]

**Table S1.** The list of recorded lichen and bryophyte taxa on living retention trees in surveys 11 and 18 years after clear felling (in 2014 and 2021, respectively). The number of trees where each species was recorded and relative projective cover (trees without species excluded) of each species are shown. Indicator species are marked \*.

| Lichens                         | Species abbreviations | Number of trees, relative projective cover (in brackets) |             | Bryophytes                         | Species abbreviations | Number of trees, relative projective cover (in brackets) |             |
|---------------------------------|-----------------------|----------------------------------------------------------|-------------|------------------------------------|-----------------------|----------------------------------------------------------|-------------|
|                                 |                       | 2014 (n=98)                                              | 2021 (n=86) |                                    |                       | 2014 (n=98)                                              | 2021 (n=86) |
| <i>Acrocordia gemmata</i> *     | Acr_gem               | 12 (2.2)                                                 | 15(1.3)     | <i>Amblystegium serpens</i>        | Amb_ser               | 24 (2.5)                                                 | 32 (3.9)    |
| <i>Anaptychia ciliaris</i>      | Ana_cil               | 1 (0.1)                                                  | 1 (0.3)     | <i>Anomodontella longifolius</i> * | Ano_lon               | 2 (4.3)                                                  | 2 (15)      |
| <i>Arthonia spadicea</i> *      | Art_spa               | 1 (1.3)                                                  | 6 (1.8)     | <i>Atrichum undulatum</i>          | Atr_und               |                                                          | 1 (0.1)     |
| <i>Arthonia spp.</i>            | Art_spp               | 1(1)                                                     | 9(4.2)      | <i>Brachytheciastrum velutinum</i> | Bra_vel               | 1 (1.3)                                                  | 4 (1.0)     |
| <i>Arthonia vinosa</i> *        | Art_vin               | 1 (0.3)                                                  | 2 (1.3)     | <i>Brachythecium rutabulum</i>     | Bra_rut               | 22 (3.2)                                                 | 26 (4.2)    |
| <i>Bacidia rubella</i> *        | Bac_rub               | 1 (3.8)                                                  | 2 (3.4)     | <i>Brachythecium salebrosum</i>    | Bra_sal               | 45 (4.5)                                                 | 33 (3.9)    |
| <i>Bacidia sp.</i>              | Bac_sp.               | 1 (0.3)                                                  |             | <i>Bryum moravicum</i>             | Bry_mor               | 4 (1.8)                                                  | 7 (1.8)     |
| <i>Buellia griseovirens</i>     | Bue_gri               | 3 (0.3)                                                  |             | <i>Ceratodon purpureus</i>         | Cer_pur               | 7 (0.9)                                                  | 1 (1.3)     |
| <i>Caloplaca sp.</i>            | Cal_sp.               |                                                          | 1 (0.1)     | <i>Chiloscyphus pallenscens</i>    | Chi_pal               | 1 (0.3)                                                  | 2 (0.4)     |
| <i>Chaenotheca ferruginea</i>   | Cha_ferr              |                                                          | 1 (0.8)     | <i>Cirriphyllum piliferum</i>      | Cir_pil               | 2 (0.8)                                                  | 4 (0.6)     |
| <i>Cladonia norvegica</i>       | Cla_nor               |                                                          | 1 (0.1)     | <i>Climacium dendroides</i>        | Cli_den               | 4 (1.7)                                                  | 2 (3.4)     |
| <i>Cladonia spp.</i>            | Cla_spp               | 52(5.9)                                                  | 38(7.5)     | <i>Dicranum flagellare</i>         | Dic fla               | 1 (0.1)                                                  | 1 (0.1)     |
| <i>Evernia prunastri</i>        | Eve_pru               | 16 (0.9)                                                 | 12 (1.4)    | <i>Dicranum montanum</i>           | Dic_mon               | 31 (3.8)                                                 | 24 (4.1)    |
| <i>Graphis scripta</i> *        | Gra_scr               | 27 (2)                                                   | 25 (1.9)    | <i>Dicranum polysetum</i>          | Dic_pol               | 3 (0.3)                                                  | 2 (0.8)     |
| <i>Hypocnomyce scalaris</i>     | Hyp_sca               | 5 (5.6)                                                  | 5 (8.2)     | <i>Dicranum scoparium</i>          | Dic_sco               | 31 (2.1)                                                 | 20 (2.9)    |
| <i>Hypogymnia physodes</i>      | Hyp_phy               | 38 (4.6)                                                 | 25 (4.1)    | <i>Eurhynchium angustirete</i>     | Eur_ang               | 20 (4.7)                                                 | 36 (4.1)    |
| <i>Imshaugia aleurites</i>      | Ims_ale               |                                                          | 1 (0.1)     | <i>Fissidens adianthoides</i>      | Fis_adi               | 6 (0.7)                                                  | 5 (1.1)     |
| <i>Lecanora carpineae</i>       | Lec_car               | 7 (1.1)                                                  | 1 (2.5)     | <i>Fissidens taxifolius</i>        | Fiss_tax              | 2 (2.4)                                                  | 2 (3.1)     |
| <i>Lecanora spp.</i>            | Lec_spp               | 33(1.9)                                                  | 16(2.3)     | <i>Frullania dilatata</i>          | Fru_dil               | 20 (1.5)                                                 | 13 (3.5)    |
| <i>Lecanora subrugosa</i>       | Lec_sub               | 1 (0.5)                                                  | 1 (0.1)     | <i>Homalia trichomanoides</i> *    | Hom_tri               | 27 (5.2)                                                 | 25 (7.7)    |
| <i>Lecanora varia</i>           | Lec_var               | 3 (1.1)                                                  |             | <i>Homalothecium sericeum</i>      | Hom_ser               | 3 (7.8)                                                  |             |
| <i>Lecidella spp.</i>           | Lec_spp               | 55 (2.63)                                                | 48 (1.9)    | <i>Hylocomiadelfus triquetrus</i>  | Hyl_tri               | 11 (2.6)                                                 | 8 (3.4)     |
| <i>Lepraria spp.</i>            | Lep_spp               | 79 (6.8)                                                 | 72 (6.3)    | <i>Hylocomium splendens</i>        | Hyl_spl               | 4 (1)                                                    | 3 (0.5)     |
| <i>Lobaria pulmonaria</i> *     | Lob_pul               | 2 (0.4)                                                  | 2 (1.4)     | <i>Hypnum cupressiforme</i>        | Hyp_cup               | 59 (10.9)                                                | 65 (12.2)   |
| <i>Melanelixia glabrata</i>     | Mel_gla               | 33 (1.8)                                                 | 10 (1.2)    | <i>Lejeunea cavifolia</i> *        | Lej_cav               | 3 (0.3)                                                  | 1 (0.1)     |
| <i>Opegrapha rufescens</i>      | Ope_ruf               | 8 (1.3)                                                  | 6 (1.2)     | <i>Lepidozia reptans</i>           | Lep_rep               | 1 (0.8)                                                  | 1 (0.1)     |
| <i>Opegrapha spp.</i>           | Ope_spp               | 6(1.7)                                                   | 13 (3)      | <i>Leskea polycarpa</i>            | Les_pol               | 1 (2)                                                    | 2 (1.3)     |
| <i>Parmelia sulcata</i>         | Par_sul               | 18 (6.4)                                                 | 14 (6.8)    | <i>Leucodon sciurioides</i>        | Leu_sci               | 4 (2.4)                                                  | 5 (6)       |
| <i>Parmeliopsis ambigua</i>     | Par_amb               | 16 (3.4)                                                 | 10 (2.3)    | <i>Lewinskya speciosa</i>          | Lew_spe               | 43 (1)                                                   | 40 (1.1)    |
| <i>Parmeliopsis hyperopta</i>   | Par_hyp               |                                                          | 2 (0.4)     | <i>Lophocolea heterophylla</i>     | Lop_het               | 3(0.5)                                                   | 4(1.4)      |
| <i>Peltigera praetextata</i>    | Pel_pra               | 6 (2.3)                                                  | 10 (2.7)    | <i>Metzgeria furcata</i> *         | Met_fur               | 3(0.3)                                                   | 1(1.3)      |
| <i>Pertusaria amara</i>         | Per_ama               | 19 (2.5)                                                 | 18 (1.9)    | <i>Mnium hornum</i>                | Mni_hor               | 3 (0.5)                                                  | 7 (1.4)     |
| <i>Pertusaria pertusa</i> *     | Per_per               | 2 (0.2)                                                  | 1 (1.5)     | <i>Neckera pennata</i> *           | Nec_pen               | 14 (6.2)                                                 | 16 (6.5)    |
| <i>Phaeophyscia orbicularis</i> | Pha_orb               |                                                          | 6 (10.4)    | <i>Neoorthocaulis attenuatus</i> * | Neo_att               | 1 (1.3)                                                  | 1 (1.8)     |
| <i>Phlyctis argena</i>          | Phl_arg               | 77 (9.1)                                                 | 70 (8)      | <i>Plagiochila asplenoides</i>     | Pla_asp               | 9 (1)                                                    | 8 (0.8)     |
| <i>Physcia tenella</i>          | Phy_ten               | 20 (1.4)                                                 | 3 (0.7)     | <i>Plagiomnium affine</i>          | Pla_aff               | 14 (1.5)                                                 | 23 (1.4)    |
| <i>Platismatia glauca</i>       | Pla_gla               | 12 (4.4)                                                 | 14 (3.9)    | <i>Plagiomnium cuspidatum</i>      | Pla_cus               | 34 (1.4)                                                 | 29 (1.2)    |
| <i>Pseudevernia furfuracea</i>  | Pse_fur               | 3 (0.9)                                                  | 1 (3)       | <i>Plagiomnium undulatum</i>       | Pla_und               | 7 (0.4)                                                  | 5 (1.7)     |

|                            |         |          |         |                                   |          |          |          |
|----------------------------|---------|----------|---------|-----------------------------------|----------|----------|----------|
| <i>Ramalina farinacea</i>  | Ram_far | 2 (0.4)  | 1 (0.1) | <i>Plagiothecium laetum</i>       | Pla_lae  | 7 (0.8)  | 8 (1.3)  |
| <i>Ramalina spp.</i>       | Ram_spp | 4(0.7)   | 5(0.1)  | <i>Plagiothecium latebricola</i>  | Pla_lat  |          | 3 (0.1)  |
| <i>Usnea filipendula</i>   | Usn_fil | 5 (0.2)  | 3 (1.1) | <i>Platygyrium repens</i>         | Pla_rep  | 9 (2.2)  | 5 (2.6)  |
| <i>Vulpicida pinastri</i>  | Vul_pin | 25 (0.3) | 3 (0.2) | <i>Pleurozium schreberi</i>       | Ple_sch  | 9 (1.4)  | 7 (2.4)  |
| <i>Xanthoria parietina</i> | Xan_par | 8 (0.2)  | 1 (0.1) | <i>Polytrichum juniperinum</i>    | Pol_jun  | 5 (1.1)  | 2 (0.4)  |
|                            |         |          |         | <i>Pseudoamblystegium subtile</i> | Pse_sub  | 3 (0.7)  | 7 (4.1)  |
|                            |         |          |         | <i>Ptilidium ciliare</i>          | Pti_cil  |          | 5 (2.9)  |
|                            |         |          |         | <i>Ptilidium pulcherrimum</i>     | Pti_pul  | 13 (4.4) | 14 (4.2) |
|                            |         |          |         | <i>Pylaisia polyantha</i>         | Pyl_pol  | 33 (2.4) | 39 (3.1) |
|                            |         |          |         | <i>Radula complanata</i>          | Rad_com  | 57 (5.6) | 54 (6.1) |
|                            |         |          |         | <i>Rhodobryum roseum</i>          | Rho_ros  | 7 (0.5)  | 6 (0.9)  |
|                            |         |          |         | <i>Sanionia uncinata</i>          | San_unc  | 3 (0.1)  | 1 (0.1)  |
|                            |         |          |         | <i>Sciuro-hypnum oedipodium</i>   | Sci_oed  | 1 (1.3)  | 1 (0.1)  |
|                            |         |          |         | <i>Sciuro-hypnum populeum</i>     | Sci_pop  |          | 1 (1.3)  |
|                            |         |          |         | <i>Syzygiella autumnalis*</i>     | Syx_aut  | 1 (0.1)  | 2 (1.9)  |
|                            |         |          |         | <i>Tetraphis pellucida</i>        | Tet_pell | 2 (0.3)  | 1 (0.1)  |
|                            |         |          |         | <i>Thuidium tamariscinum</i>      | Thu_tam  | 16 (3.3) | 13 (2.3) |
|                            |         |          |         | <i>Ulotia spp.*</i>               | Ulo_spp  | 18 (0.2) | 15 (0.2) |

**Table S2.** Strength ( $\chi^2$ -value) and significances (p-value) of fixed effects of year, tree species, diameter, forest type on lichen and bryophyte species richness, cover, Shannon diversity index, as well as variance related to the random effects of tree and plot.

**Richness of species**

| <i>Fixed effects</i>  | Total                   |         | Bryophytes              |         | Lichens                 |         | Indicators              |         |
|-----------------------|-------------------------|---------|-------------------------|---------|-------------------------|---------|-------------------------|---------|
|                       | Chi-Square ( $\chi^2$ ) | p-value | Chi-Square ( $\chi^2$ ) | p-value | Chi-Square ( $\chi^2$ ) | p-value | Chi-Square ( $\chi^2$ ) | p-value |
| Year                  | 0.40                    | 0.53    | 3.04                    | 0.08    | 0.98                    | 0.32    | 0.06                    | 0.8     |
| Tree species          | 28.93                   | <0.001  | 27.15                   | <0.001  | 19.19                   | <0.05   | 41.88                   | <0.001  |
| Diameter              | 2.83                    | 0.09    | 10.6                    | <0.01   | 1.17                    | 0.28    | 1.19                    | 0.28    |
| Forest type           | 8.48                    | 0.39    | 8.92                    | 0.35    | 7.51                    | 0.49    | 9.2                     | 0.33    |
| <i>Random effects</i> | Variance                |         | Estimated correlations  |         | Variance                |         | Estimated correlations  |         |
|                       |                         |         |                         |         |                         |         |                         |         |
| Tree                  | <0.001                  |         | <0.001                  |         | <0.001                  |         | 0.039                   |         |
| Studied plot          | <0.001                  |         | <0.001                  |         | <0.001                  |         | <0.001                  |         |
| Random slope year     | <0.001                  | -1      | <0.001                  | -1      | <0.001                  | -1      | 0.01                    | -       |
| <i>R squared</i>      | R2m                     | R2c     | R2m                     | R2c     | R2m                     | R2c     | R2m                     | R2c     |
|                       | 0.29                    | 0.46    | 0.45                    | 0.56    | 0.18                    | 0.28    | 0.9                     | 0.91    |

**Cover of species**

| <i>Fixed effects</i> | Total                   |         | Bryophytes              |         | Lichens                 |         | Indicators              |         |
|----------------------|-------------------------|---------|-------------------------|---------|-------------------------|---------|-------------------------|---------|
|                      | Chi-Square ( $\chi^2$ ) | p-value | Chi-Square ( $\chi^2$ ) | p-value | Chi-Square ( $\chi^2$ ) | p-value | Chi-Square ( $\chi^2$ ) | p-value |
| Year                 | 3.9                     | <0.05   | 15.47                   | <0.001  | 0.04                    | 0.83    | 1.58                    | 0.21    |
| Tree species         | 15.63                   | <0.05   | 22.8                    | <0.001  | 13.46                   | 0.1     | 9.17                    | 0.33    |
| Diameter             | 0.62                    | 0.43    | 11.34                   | <0.001  | 1.1                     | 0.29    | 0.05                    | 0.82    |
| Forest type          | 12.19                   | 0.09    | 11.83                   | 0.1     | 4.35                    | 0.74    | 10.96                   | 0.2     |

| <i>Random effects</i>          | Variance                      | Estimated correlations | Variance                           | Estimated correlations | Variance                        | Estimated correlations | Variance                           | Estimated correlations |
|--------------------------------|-------------------------------|------------------------|------------------------------------|------------------------|---------------------------------|------------------------|------------------------------------|------------------------|
| Tree                           | 52.41                         |                        | 47.48                              |                        | 63.45                           |                        | 16.53                              |                        |
| Studied plot                   | 85.9                          |                        | 6.12                               |                        | 133.19                          |                        | 50.98                              |                        |
| Random slope year              | 93.13                         | -1                     | 7.58                               | -1                     | 50.98                           | -0.65                  | 8.749                              | 1                      |
| Residual                       | 168.78                        |                        | 101.5                              |                        | 67.46                           |                        | 13.04                              |                        |
| <i>R squared</i>               | R2m                           | R2c                    | R2m                                | R2c                    | R2m                             | R2c                    | R2m                                | R2c                    |
|                                | 0.18                          | 0.47                   | 0.39                               | 0.6                    | 0.19                            | 0.77                   | 0.18                               | 0.9                    |
| <b>Shannon diversity index</b> |                               |                        |                                    |                        |                                 |                        |                                    |                        |
| <i>Fixed effects</i>           | Total Chi-Square ( $\chi^2$ ) | p-value                | Bryophytes Chi-Square ( $\chi^2$ ) | p-value                | Lichens Chi-Square ( $\chi^2$ ) | p-value                | Indicators Chi-Square ( $\chi^2$ ) | p-value                |
| Year                           | 5.75                          | <0.05                  | 12.21                              | <0.001                 | 0.003                           | 0.95                   | 0.26                               | 0.61                   |
| Tree species                   | 33.21                         | <0.001                 | 45.09                              | <0.001                 | 14.72                           | 0.06                   | 35.79                              | <0.001                 |
| Diameter                       | 1.5                           | 0.22                   | 5.97                               | <0.05                  | 0.62                            | 0.43                   | 1.12                               | 0.29                   |
| Forest type                    | 3.97                          | 0.78                   | 4.21                               | 0.84                   | 2.26                            | 0.97                   | 3.41                               | 0.91                   |
| <i>Random effects</i>          | Variance                      | Estimated correlations | Variance                           | Estimated correlations | Variance                        | Estimated correlations | Variance                           | Estimated correlations |
| Tree                           | 0.03                          |                        | 0.04                               |                        | 0.06                            |                        | 0.03                               |                        |
| Studied plot                   | 0.12                          |                        | 0.17                               |                        | 0.07                            |                        | 0.012                              |                        |
| Random slope year              | 0.03                          | -0.68                  | 0.03                               |                        | 0.05                            | -0.79                  | 0.01                               | 0.11                   |
| Residual                       | 0.04                          |                        | 0.06                               |                        | 0.06                            |                        | 0.02                               |                        |
| <i>R squared</i>               | R2m                           | R2c                    |                                    |                        | R2m                             | R2c                    | R2m                                | R2c                    |
|                                | 0.31                          | 0.83                   |                                    |                        | 0.17                            | 0.74                   | 0.42                               | 0.8                    |
